# Supplementary material for: Identification of CIITA Regulated Genetic Module Dedicated for Antigen Presentation
Source: PubMed Central journal article supplement (PMC2278383; doi:10.1371/journal.pgen.1000058), 2008-04-25

Figure S2

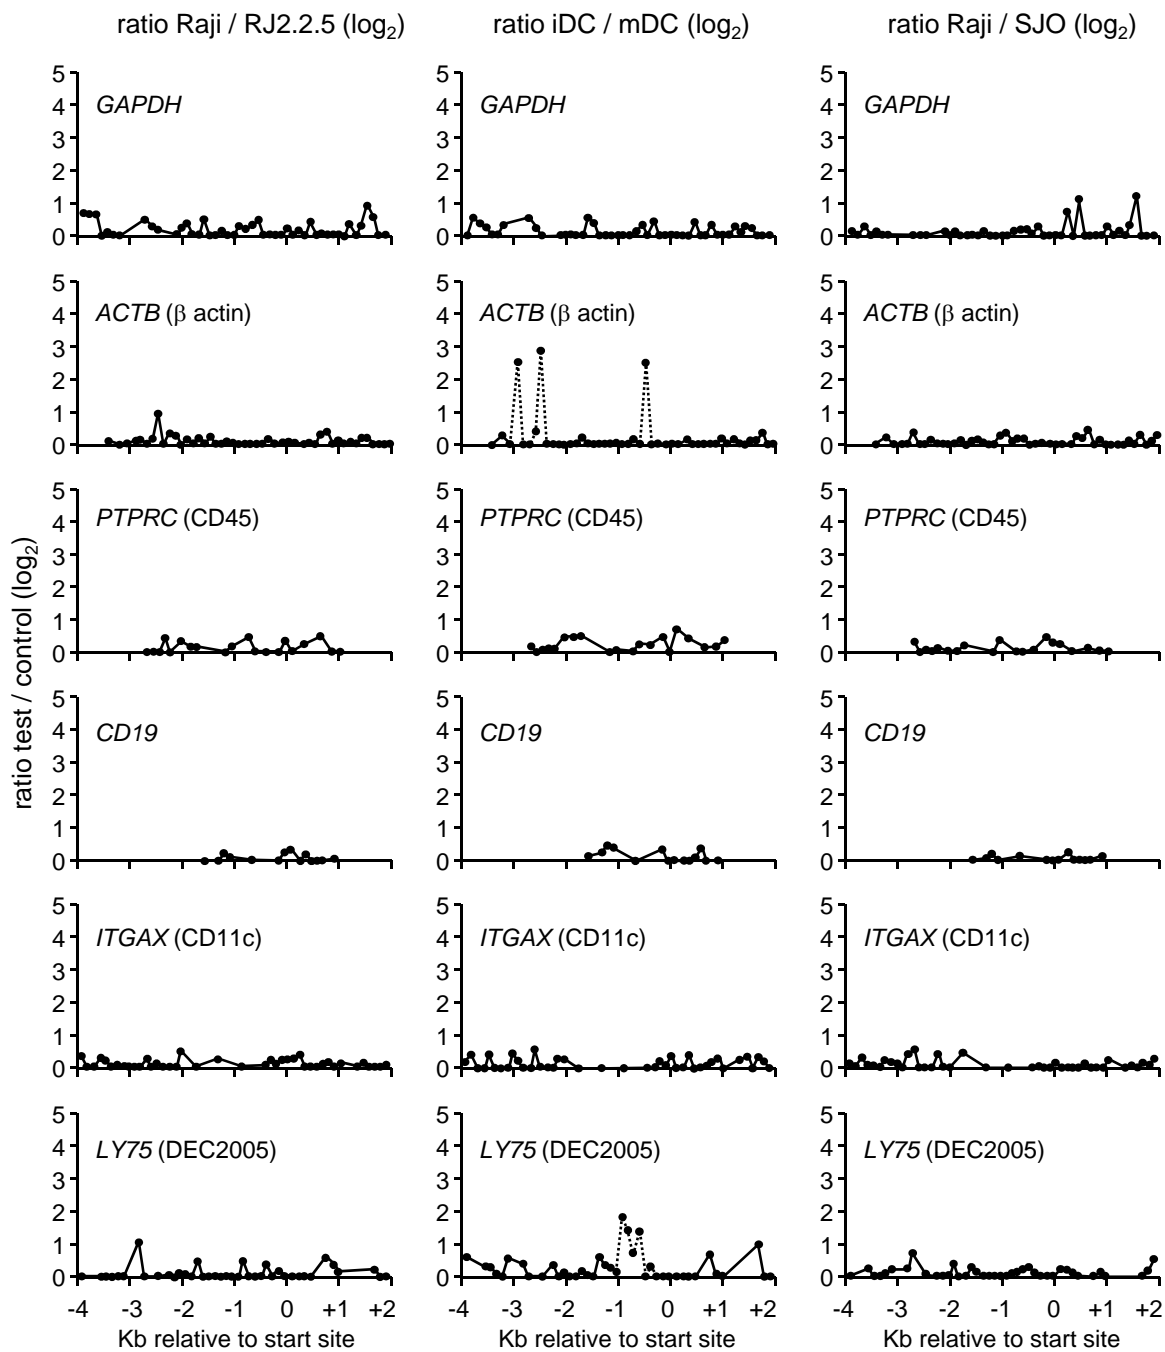

Supplement: pgen.1000058.s002.pdf [file pgen.1000058.s002.pdf]
