# Supplementary material for: Identification of CIITA Regulated Genetic Module Dedicated for Antigen Presentation
Source: PubMed Central journal article supplement (PMC2278383; doi:10.1371/journal.pgen.1000058), 2008-04-25
Supplement: pgen.1000058.s007.pdf [file pgen.1000058.s007.pdf]

**Table S1.** Score 1 genes identified by CIITA-ChIP-chip experiments.

| gene            | accession    | validation by ChIP <sup>1</sup> | gene            | accession    | validation by ChIP <sup>1</sup> |
|-----------------|--------------|---------------------------------|-----------------|--------------|---------------------------------|
| <i>AK092544</i> | AK092544     | nt                              | <i>LRRC51</i>   | NM_145309    | nt                              |
| <i>AK124820</i> | AK124820     | nt                              | <i>MARCO</i>    | NM_006770    | nt                              |
| <i>APIS2</i>    | NM_003916    | negative                        | <i>MAT2A</i>    | NM_005911    | nt                              |
| <i>AY010114</i> | AY010114     | nt                              | <i>MGC52000</i> | BC073913     | nt                              |
| <i>BTN2A2</i>   | NM_006995    | nt                              | <i>MLL5</i>     | NM_182931    | negative                        |
| <i>C4A</i>      | NM_007293    | negative                        | <i>MRPL47</i>   | NM_020409    | nt                              |
| <i>CACYBP</i>   | NM_014412    | nt                              | <i>MSH3</i>     | NM_002439    | nt                              |
| <i>CALML3</i>   | NM_005185    | negative                        | <i>MYLK</i>     | NM_053025    | nt                              |
| <i>CEP63</i>    | NM_025180    | negative                        | <i>NBPF11</i>   | NM_183372    | nt                              |
| <i>CKMT1</i>    | NM_001015001 | nt                              | <i>NBPF14</i>   | NM_015383    | nt                              |
| <i>CNOT7</i>    | NM_054026    | nt                              | <i>NIN</i>      | NM_182944    | nt                              |
| <i>COG5</i>     | NM_006348    | nt                              | <i>NPIP</i>     | NM_006985    | negative                        |
| <i>CR749856</i> | CR749856     | nt                              | <i>NPL</i>      | NM_030769    | nt                              |
| <i>DLX6</i>     | NM_005222    | nt                              | <i>OR5AY1</i>   | NM_001004732 | nt                              |
| <i>DVL2</i>     | NM_004422    | negative                        | <i>PARVG</i>    | NM_022141    | nt                              |
| <i>ECSIT</i>    | NM_016581    | nt                              | <i>PHACS</i>    | NM_032592    | nt                              |
| <i>ENO1</i>     | NM_001428    | nt                              | <i>PLOD3</i>    | NM_001084    | nt                              |
| <i>FOS</i>      | NM_005252    | nt                              | <i>PSMA2</i>    | NM_002787    | nt                              |
| <i>GCUD2</i>    | NM_207418    | nt                              | <i>RBM12B</i>   | NM_203390    | nt                              |
| <i>GORASP1</i>  | NM_031899    | nt                              | <i>RNASE7</i>   | NM_032572    | nt                              |
| <i>GTPBP3</i>   | NM_133644    | nt                              | <i>SFRS2</i>    | NM_003016    | negative                        |
| <i>IGHA1</i>    | AK128476     | nt                              | <i>SGK</i>      | NM_005627    | nt                              |
| <i>IMAA</i>     | AB040413     | negative                        | <i>TLR4</i>     | NM_138554    | nt                              |
| <i>IQCH</i>     | NM_001031715 | nt                              | <i>TMED1</i>    | NM_006858    | nt                              |
| <i>JMJD1A</i>   | NM_018433    | negative                        | <i>TMEM14C</i>  | NM_016462    | nt                              |
| <i>KIR3DL1</i>  | NM_013289    | nt                              | <i>TNFRSF9</i>  | NM_001561    | nt                              |
| <i>KIR2DL3</i>  | NM_014511    | nt                              | <i>TRAF2</i>    | NM_021138    | nt                              |
| <i>KIR2DS4</i>  | NM_012314    | nt                              | <i>TTC11</i>    | NM_016068    | nt                              |
| <i>KRT14</i>    | NM_000526    | nt                              | <i>ZFAND3</i>   | NM_021943    | nt                              |
| <i>KRTAP5-9</i> | NM_005553    | nt                              |                 |              |                                 |

<sup>1</sup>Results of classical ChIP experiments; negative, no detectable binding of CIITA; nt, not tested.
