# Supplementary material for: Identification of CIITA Regulated Genetic Module Dedicated for Antigen Presentation
Source: PubMed Central journal article supplement (PMC2278383; doi:10.1371/journal.pgen.1000058), 2008-04-25
Supplement: pgen.1000058.s010.pdf [file pgen.1000058.s010.pdf]

**Table S4.** Primer sequences used for real-time RT-PCR<sup>1</sup>.

| mRNA            | Forward                | Reverse                     |
|-----------------|------------------------|-----------------------------|
| <i>HLA-DRA</i>  | GCCAACCTGGAAATCATGACA  | AGGGCTGTTCGTGAGCACA         |
| <i>HLA-C</i>    | CAGAAGTACAAGCGCCAGG    | TAGGCGGACTGGTCATACC         |
| <i>RAB4B</i>    | GGTGGGAAGACTGTGAAG     | GTAATAACTCCGCGTCACTG        |
| <i>TRIM26</i>   | TTCATTCCAGCCTCGCAGTC   | GCTCCAGCACTCAGTCAATC        |
| <i>FLJ45422</i> | CAGTACTCTGATGCATCTCAT  | TGCTGCTGTCAGAGATGAG         |
| <i>KIA0841</i>  | CCTCTGGTGCTGGGATCTAC   | CTCAGGGATTTCGCTCCAGTG       |
| <i>RFX5</i>     | GCCAAGTACACTGAGCAATG   | GCAACAGGCAAGACTCTCAC        |
| <i>ZNF672</i>   | CGGTGTCTGAGGAGGCAGTC   | AGTCCCAAGGCACGCTCTTC        |
| <i>MYBPC2</i>   | AGGTCGGTGATGCCATACTG   | AGTGGCCTGTTGAAGAAGAG        |
| <i>TPP1</i>     | TCTCTGGCAAATGCAGTTAC   | AAGGTGAGACTCAGCTCTTC        |
| <i>PSMD3</i>    | ATCACGCCCGGGTCTATGAG   | ATGCCGAAGCGTAGCTGTCC        |
| <i>18S</i>      | CTTAGAGGGACAAGTGCGC    | ACGCTGAGCCAGTCAGTGTA        |
| <i>RFXANK</i>   | GAACCGGATGCCAGTGTTTC   | AGAGTGGTGGAGTGCTTCAG        |
| <i>RFXAP</i>    | GTCAAACCTCGAGGAAAGTGCA | TTCTGGACTTCTTAGTAACGACAGTCT |

<sup>1</sup>Sequences are provided in the 5'-3' orientation.
